# Supplementary material for: Characterisation of vaccine breakthrough infections of SARS-CoV-2 Delta and Alpha variants and within-host viral load dynamics in the community, France, June to July 2021
Source: PubMed Central journal article supplement (PMC8447828; doi:10.2807/1560-7917.es.2021.26.37.2100824), 2021-09-16
Supplement: 21-00824_DEBARRE_Supplement.pdf [file 21-00824_DEBARRE_Supplement.pdf]

## Supplement

François Blanquart, Clémence Abad, Joëvin Ambroise, Mathieu Bernard, Gina Cosentino, Jean-Marc Giannoli, Florence Débarre.

This supplementary material is hosted by *Eurosurveillance* as supporting information alongside the article “*Characterisation of vaccine breakthrough infections of SARS-CoV-2 Delta and Alpha variants and within-host viral load dynamics in the community, France, June to July 2021*”, on behalf of the authors, who remain responsible for the accuracy and appropriateness of the content. The same standards for ethics, copyright, attributions and permissions as for the article apply. Supplements are not edited by *Eurosurveillance* and the journal is not responsible for the maintenance of any links or email addresses provided therein.

### **Age distribution of 8,437 individuals included in the first analysis (not controlled for time since symptom onset)**

| Age category  | N vaccinated | N unvaccinated |
|---------------|--------------|----------------|
| 09            | 1            | 263            |
| 19            | 76           | 1463           |
| 29            | 220          | 2644           |
| 39            | 171          | 1446           |
| 49            | 131          | 805            |
| 59            | 125          | 567            |
| 69            | 96           | 194            |
| 79            | 82           | 66             |
| 89            | 32           | 36             |
| 90+           | 8            | 9              |
| Other/Unknown | 1            | 1              |

### **Sex of 8,437 individuals included in the first analysis (not controlled for time since symptom onset)**

| Sex     | N vaccinated | N unvaccinated |
|---------|--------------|----------------|
| F       | 394          | 2780           |
| M       | 330          | 2679           |
| Unknown | 219          | 2035           |

**Age distribution of 3,439 individuals included in the second analysis (controlled for time since symptom onset)**

| Age category  | N vaccinated | N unvaccinated |
|---------------|--------------|----------------|
| 19            | 31           | 554            |
| 29            | 116          | 1118           |
| 39            | 72           | 609            |
| 49            | 51           | 330            |
| 59            | 69           | 211            |
| 69            | 37           | 74             |
| 79            | 33           | 19             |
| 89            | 16           | 11             |
| 90+           | 1            | 2              |
| Other/Unknown | 1            | 0              |

**Sex of 3,439 individuals included in the second analysis (controlled for time since symptom onset)**

| Sex     | N vaccinated | N unvaccinated |
|---------|--------------|----------------|
| F       | 189          | 1378           |
| M       | 142          | 1288           |
| Unknown | 96           | 346            |

## Variables

| name   | type          | description                                               |
|--------|---------------|-----------------------------------------------------------|
| sympf  | factor (0, 1) | Whether the individual is fully vaccinated (1) or not (0) |
| deltaf | factor (0, 1) | Whether the L452R is detected (1) or not (0)              |
| vacf   | factor (0, 1) | Whether the individual is fully vaccinated (1) or not (0) |
| Ct     | numeric       | Ct value, RdRp gene                                       |
| tSS    | numeric       | Time since symptom onset (days)                           |

## Linear Model not controlling for time since symptom onset

```
mdlAov$call
```

```
## aov(formula = Ct ~ vacf * sympf * deltaf, data = tmp)
```

```
summary(mdlAov)
```

```
##           Df Sum Sq Mean Sq  F value    Pr(>F)
## vacf       1     351      351    12.108 0.000505 ***
## sympf      1    15200    15200   524.896 < 2e-16 ***
## deltaf     1    32358    32358  1117.379 < 2e-16 ***
## vacf:sympf 1     775      775    26.766 2.35e-07 ***
## vacf:deltaf 1     144      144     4.970 0.025819 *
## sympf:deltaf 1     359      359    12.412 0.000429 ***
## vacf:sympf:deltaf 1     227      227     7.837 0.005130 **
## Residuals 8429  244096      29
## ---
## Signif. codes:  0 '***' 0.001 '**' 0.01 '*' 0.05 '.' 0.1 ' ' 1
```

```
thsd
```

```
## Tukey multiple comparisons of means
## 95% family-wise confidence level
##
## Fit: aov(formula = Ct ~ vacf * sympf * deltaf, data = tmp)
##
## $vacf
##           diff          lwr          upr      p adj
## 1-0 0.6470032 0.2825148 1.011492 0.0005046
##
## $sympf
##           diff          lwr          upr      p adj
## 1-0 -2.726566 -2.960009 -2.493124 0
##
## $deltaf
##           diff          lwr          upr      p adj
## 1-0 -6.72394 -7.121566 -6.326314 0
##
## `$vacf:sympf`
##           diff          lwr          upr      p adj
```

```

## 1:0-0:0  1.6816459  1.0341760  2.3291159  0.0000000
## 0:1-0:0  -2.5080529 -2.8335307 -2.1825750  0.0000000
## 1:1-0:0  -2.7595748 -3.4541112 -2.0650384  0.0000000
## 0:1-1:0  -4.1896988 -4.8526381 -3.5267595  0.0000000
## 1:1-1:0  -4.4412207 -5.3445110 -3.5379303  0.0000000
## 1:1-0:1  -0.2515219 -0.9605014  0.4574576  0.7986775
##
## $`vacf:deltaf`
##          diff          lwr          upr          p adj
## 1:0-0:0  2.0758433  0.4153934  3.736293  0.0072293
## 0:1-0:0 -6.5769166 -7.1265213 -6.027312  0.0000000
## 1:1-0:0 -5.9746925 -6.6780558 -5.271329  0.0000000
## 0:1-1:0 -8.6527600 -10.2374675 -7.068052  0.0000000
## 1:1-1:0 -8.0505358 -9.6949058 -6.406166  0.0000000
## 1:1-0:1  0.6022242  0.1033012  1.101147  0.0104180
##
## $`sympf:deltaf`
##          diff          lwr          upr p adj
## 1:0-0:0 -3.824406 -5.040470 -2.608343  0
## 0:1-0:0 -7.225312 -7.822622 -6.628002  0
## 1:1-0:0 -9.324285 -9.933266 -8.715303  0
## 0:1-1:0 -3.400906 -4.500778 -2.301033  0
## 1:1-1:0 -5.499879 -6.606133 -4.393624  0
## 1:1-0:1 -2.098973 -2.417982 -1.779963  0
##
## $`vacf:sympf:deltaf`
##          diff          lwr          upr          p adj
## 1:0:0-0:0:0  4.0748024  1.8402263  6.30937863  0.0000009
## 0:1:0-0:0:0 -3.1720965 -4.6903764 -1.65381653  0.0000000
## 1:1:0-0:0:0 -5.0857054 -8.9932302 -1.17818060  0.0020482
## 0:0:1-0:0:0 -6.9645855 -7.7063452 -6.22282583  0.0000000
## 1:0:1-0:0:0 -5.5406910 -6.5774897 -4.50389237  0.0000000
## 0:1:1-0:0:0 -8.8873726 -9.6453033 -8.12944188  0.0000000
## 1:1:1-0:0:0 -9.0238193 -10.0823280 -7.96531060  0.0000000
## 0:1:0-1:0:0 -7.2468989 -9.7636751 -4.73012268  0.0000000
## 1:1:0-1:0:0 -9.1605078 -13.5534270 -4.76758868  0.0000000
## 0:0:1-1:0:0 -11.0393880 -13.1792936 -8.89948235  0.0000000
## 1:0:1-1:0:0 -9.6154935 -11.8746836 -7.35630334  0.0000000
## 0:1:1-1:0:0 -12.9621750 -15.1077397 -10.81661041  0.0000000
## 1:1:1-1:0:0 -13.0986217 -15.3678571 -10.82938634  0.0000000
## 1:1:0-0:1:0 -1.9136089 -5.9890944  2.16187654  0.8466421
## 0:0:1-0:1:0 -3.7924891 -5.1676397 -2.41733844  0.0000000
## 1:0:1-0:1:0 -2.3685946 -3.9228736 -0.81431555  0.0001056
## 0:1:1-0:1:0 -5.7152761 -7.0992165 -4.33133582  0.0000000
## 1:1:1-0:1:0 -5.8517228 -7.4205671 -4.28287852  0.0000000
## 0:0:1-1:1:0 -1.8788802 -5.7330487  1.97528842  0.8194703
## 1:0:1-1:1:0 -0.4549857 -4.3766383  3.46666698  0.9999686
## 0:1:1-1:1:0 -3.8016672 -7.6589806  0.05564621  0.0567588
## 1:1:1-1:1:0 -3.9381139 -7.8655620 -0.01066581  0.0488069
## 1:0:1-0:0:1  1.4238945  0.6109881  2.23680092  0.0000031

```

```
## 0:1:1-0:0:1 -1.9227871 -2.3231923 -1.52238184 0.0000000
## 1:1:1-0:0:1 -2.0592338 -2.8996539 -1.21881362 0.0000000
## 0:1:1-1:0:1 -3.3466816 -4.1743701 -2.51899298 0.0000000
## 1:1:1-1:0:1 -3.4831282 -4.5926552 -2.37360130 0.0000000
## 1:1:1-0:1:1 -0.1364467 -0.9911733 0.71827990 0.9997296
```

## Linear model controlling for time since symptom onset

### Full model

```
mdl$call
## lm(formula = Ct ~ vacf * deltaf * tSS, data = dat.nodupl)
car::Anova(mdl)
## Anova Table (Type II tests)
##
## Response: Ct
##           Sum Sq   Df F value    Pr(>F)
## vacf           27    1   1.2884  0.256427
## deltaf        3192    1 152.3081 < 2.2e-16 ***
## tSS           9487    1 452.6392 < 2.2e-16 ***
## vacf:deltaf     5    1   0.2289  0.632364
## vacf:tSS         0    1   0.0044  0.947141
## deltaf:tSS      211    1  10.0434  0.001542 **
## vacf:deltaf:tSS  44    1   2.1114  0.146299
## Residuals     71911 3431
## ---
## Signif. codes:  0 '***' 0.001 '**' 0.01 '*' 0.05 '.' 0.1 ' ' 1
```

### Reduced model with significant effect only (used for the Figure)

```
mdl1$call
## lm(formula = Ct ~ deltaf + tSS + deltaf * tSS, data = dat.nodupl)
car::Anova(mdl1)
## Anova Table (Type II tests)
##
## Response: Ct
##           Sum Sq   Df F value    Pr(>F)
## deltaf      3231    1 154.156 < 2.2e-16 ***
## tSS         9512    1 453.905 < 2.2e-16 ***
## deltaf:tSS   228    1  10.872 0.0009863 ***
## Residuals   71987 3435
## ---
## Signif. codes:  0 '***' 0.001 '**' 0.01 '*' 0.05 '.' 0.1 ' ' 1
```
